# Supplementary material for: Alteration of Excitation/Inhibition Imbalance in the Hippocampus and Amygdala of Drug-Resistant Epilepsy Patients Treated with Acute Vagus Nerve Stimulation
Source: MDPI journal article supplement (doi:10.3390/brainsci13070976), 2023-06-21
Supplement: s1 [file s1]

## Article

# Alteration of Excitation/Inhibition Imbalance in the Hippocampus and Amygdala of Drug-Resistant Epilepsy Patients Treated with Acute Vagus Nerve Stimulation

Qian Yi Ooi <sup>1</sup> , Xiaoya Qin <sup>1,2</sup>, Yuan Yuan <sup>1,2,\*</sup>, Xiaobin Zhang <sup>3,\*</sup>, Yi Yao <sup>3,4</sup>, Hongwei Hao <sup>1</sup> and Luming Li <sup>1,2,5</sup>

<sup>1</sup> National Engineering Research Center of Neuromodulation, School of Aerospace Engineering, Tsinghua University, Beijing 100084, China

<sup>2</sup> Precision Medicine and Healthcare Research Center, Tsinghua-Berkeley Shenzhen Institute, Tsinghua University, Shenzhen 518071, China

<sup>3</sup> Department of Functional Neurosurgery, Xiamen Humanity Hospital, Fujian Medical University, Fuzhou 350005, China

<sup>4</sup> Surgery Division, Epilepsy Center, Shenzhen Children's Hospital, Shenzhen 518038, China

<sup>5</sup> IDG/McGovern Institute for Brain Research, Tsinghua University, Beijing 100084, China

\* Correspondence: yyuan918@163.com (Y.Y.); zxb8989@126.com (X.Z.)

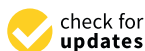

**Citation:** Ooi, Q.Y.; Qin, X.; Yuan, Y.; Zhang, X.; Yao, Y.; Hao, H.; Li, L. Alteration of Excitation/Inhibition Imbalance in the Hippocampus and Amygdala of Drug-Resistant Epilepsy Patients Treated with Acute Vagus Nerve Stimulation. *Brain Sci.* **2023**, *13*, 976. <https://doi.org/10.3390/brainsci13070976>

Academic Editor: Firstname  
Lastname

Received: 8 May 2023

Revised: 9 June 2023

Accepted: 16 June 2023

Published: 21 June 2023

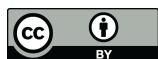

**Copyright:** © 2023 by the authors. Licensee MDPI, Basel, Switzerland. This article is an open access article distributed under the terms and conditions of the Creative Commons Attribution (CC BY) license (<https://creativecommons.org/licenses/by/4.0/>).

**Table S1.** Clinical characteristics of the patients.

| Subject                 | Patient 1                                                                                                              | Patient 2                                                                                               | Patient 3                                                                                                                                                                                                 | Patient 4                                                                                                       | Patient 5                                                                                   |
|-------------------------|------------------------------------------------------------------------------------------------------------------------|---------------------------------------------------------------------------------------------------------|-----------------------------------------------------------------------------------------------------------------------------------------------------------------------------------------------------------|-----------------------------------------------------------------------------------------------------------------|---------------------------------------------------------------------------------------------|
| Gender                  | Male                                                                                                                   | Male                                                                                                    | Male                                                                                                                                                                                                      | Male                                                                                                            | Male                                                                                        |
| Age at VNS implantation | 8 years                                                                                                                | 5 years 11 months                                                                                       | 3 years 9 months                                                                                                                                                                                          | 4 years                                                                                                         | 5 years 7 months                                                                            |
| Age at SEEG assessment  | 9 year 4 months                                                                                                        | 8 years 11 months                                                                                       | 8 years 2 months                                                                                                                                                                                          | 5 years 6 months                                                                                                | 6 years 10 months                                                                           |
| Age at epilepsy onset   | 6 months                                                                                                               | 2 years 4 months                                                                                        | 1 year 4 months                                                                                                                                                                                           | 1 month                                                                                                         | 1 year 1 month                                                                              |
| Etiology                | Missense mutation of DEPDC5 gene; Lennox-gastaut syndrome                                                              | SCN7A gene mutation                                                                                     | Sequelae of encephalitis                                                                                                                                                                                  | Infantile spasm; Dysplasia of the left frontal and insular cortex<br>Left hemispheric volume reduction;         | MCD                                                                                         |
| MRI                     | MRI negative                                                                                                           | Bilateral cortical dysplasia                                                                            | Bilateral brain atrophy                                                                                                                                                                                   | Loss of gray-white matter differentiation in the left frontal lobe                                              | Left temporo-parieto-occipital focal cortical dysplasia                                     |
| Seizure type            | Tonic, spasm, myoclonic                                                                                                | Spasm, tonic, focal, mixed<br>Left frontal lobe, middle of anterior fronto-temporal lobe, parietal lobe | Myoclonic, clonic, partial<br>Multiple lesions in both hemispheres, especially in the left hemisphere                                                                                                     | Tonic, spasm, partial                                                                                           | Spasm, tonic, complex partial                                                               |
| Seizure onset           | Left hemisphere                                                                                                        |                                                                                                         | Seizure frequency was decreased by 90% at the sixth month of VNS therapy but began to increase gradually from the ninth month; Current seizure frequency was about 30% lower than that before VNS therapy | Left hemisphere                                                                                                 | Left temporo-parieto-occipital lobe                                                         |
| VNS outcome             | Seizure frequency was reduced by about 50%; Status epilepticus happened more frequently when VNS device was turned off | Seizure frequency was reduced by about 50%                                                              |                                                                                                                                                                                                           | Frequency of subtle seizure was decreased by less than 25%; Duration of GTCS was shortened from 10 min to 3 min | Seizure frequency was reduced by less than 25%; Walking and language were slightly improved |

VNS, vagus nerve stimulation; SEEG, stereo-electroencephalography; MRI, magnetic resonance imaging; MCD, Malformations of cortical development; GTCS, generalized tonic-clonic seizures; RFTC, radiofrequency thermocoagulation

**Table S2.** Clinical characteristics of the patients. (Continued)

| Subject                 | Patient 6                                                               | Patient 7                                                                                                                   | Patient 8                                                                                           | Patient 9                                          | Patient 10                                                                                                                                                |
|-------------------------|-------------------------------------------------------------------------|-----------------------------------------------------------------------------------------------------------------------------|-----------------------------------------------------------------------------------------------------|----------------------------------------------------|-----------------------------------------------------------------------------------------------------------------------------------------------------------|
| Gender                  | Male                                                                    | Male                                                                                                                        | Female                                                                                              | Male                                               | Male                                                                                                                                                      |
| Age at VNS implantation | 1 year 6 months                                                         | 3 years 11 months                                                                                                           | 4 years 9 months                                                                                    | 8 years 2 months                                   | 4 years 2 months                                                                                                                                          |
| Age at SEEG assessment  | 2 years 4 months                                                        | 6 years 6 months                                                                                                            | 5 years 2 months                                                                                    | 10 years 8 months                                  | 5 years 4 months                                                                                                                                          |
| Age at epilepsy onset   | 2 years 4 months                                                        | 1 year                                                                                                                      | 4 months                                                                                            | 5 years                                            | 3 years                                                                                                                                                   |
| Etiology                | Sequelae of acute necrotizing encephalopathy                            | COL4A1 gene mutation; MCD                                                                                                   | Infantile spasm; CACNA1E gene mutation                                                              | Hypoglycemic encephalopathy; ulegyria in bilateral | Viral encephalitis                                                                                                                                        |
| MRI                     | Bilateral brain atrophy and bilateral hemispheric multifocal brain scar | Abnormal shape of left frontal lobe and right parietal lobe, polycerebellar gyrus deformity with cerebral fissure deformity | MRI negative                                                                                        | Encephalopathy; Bilateral ulegyria                 | MRI negative                                                                                                                                              |
| Seizure type            | Tonic-clonic, myoclonic                                                 | Partial, spasm                                                                                                              | Spasm in clusters or isolation<br>Multiple lesions in both hemispheres, especially in temporal lobe | Partial                                            | Tonic, complex partial<br>Bilateral fronto-temporo-insular lobe                                                                                           |
| Seizure onset           | Multiple lesions in both hemispheres                                    | Multiple lesions in both hemispheres                                                                                        |                                                                                                     | Multiple lesions in both hemispheres               | No improvement in seizure frequency;<br>Consciousness was recovered faster after GTCS than that before VNS therapy; Mouth twitching was no longer present |
| VNS outcome             | No improvement in seizure frequency                                     | No improvement in seizure frequency                                                                                         | No improvement in seizure frequency; Slight improvement in cognition                                | No improvement in seizure frequency                |                                                                                                                                                           |

VNS, vagus nerve stimulation; SEEG, stereo-electroencephalography; MRI, magnetic resonance imaging; MCD, Malformations of cortical development; GTCS, generalized tonic-clonic seizures
