# Supplementary figures and images for: Alteration of Excitation/Inhibition Imbalance in the Hippocampus and Amygdala of Drug-Resistant Epilepsy Patients Treated with Acute Vagus Nerve Stimulation
Source: MDPI journal article supplement (doi:10.3390/brainsci13070976), 2023-06-21

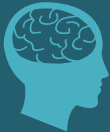

*brain  
sciences*

Supplement: s1 [file s1]

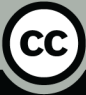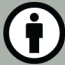

BY

Supplement: s1 [file s1]

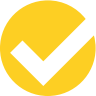

check for  
updates

Supplement: s1 [file s1]
